# Supplementary material
Source: MDPI journal article supplement (https://www.mdpi.com/2076-0760/7/2/27)
Supplement: s1 [file s1]

**Supplemental Materials**

**Perceived Gender-science Stereotypes**

In addition to personal gender-science stereotypes, *perceived* gender-science stereotypes were assessed in case participants were reluctant to admit their own personal gender-science stereotypes (Nederhof, 1985). Perceived societal stereotypes was largely included as an exploratory measure, although we did hypothesize that perceived gender-science stereotype may be stronger among those in male-dominated fields.

First, there was no gender difference in perceived gender-science stereotypes, *β*=-.013, *SE*=.009, *t*(1230)=-1.409, CI=[-.032, .005], *p*=.159. Moreover, participants perceived stronger societal gender-science stereotypes (*M*=4.69, *sd*=1.57) than they personally endorsed (*M*=3.28, *sd*=1.56), *β*=-.621, *SE*=.022, t(1229)=-27.578, CI=[-.665, -.576], *p*<.0001.

In the same path model featured in the main manuscript Figure 3, but using perceived rather than personal gender-science stereotypes, perceived gender-science stereotypes were positively related only to stronger endorsement of Assimilationism, *β*=.072, z=2.257, *p*=.024. Again, gender invariance tests confirmed that relationships between ideologies and perceived gender-science stereotypes were equivalent for men and women, χ2Δ(1)1.132, *p*s.287. Similar to the results for personal gender-science stereotypes, men in increasingly male-dominated fields also *perceived* stronger gender-science stereotypes, *β*=.164, *SE*=.050, z=3.185, *p*=.001, For women, there was no relationship between percent men in the major and perceived gender-science stereotypes, *p*=.641. A test of whether these paths differed for men and women confirmed that the relationship between percent men and perceived gender-science stereotypes was significantly different for men and women, χ2Δ(1)=5.872, *p*=.015.

**Academic Year and Pre-screen**

There were several effects due to student’s academic year and the semester in which the data was collected. In the path model presented in Figure 3, academic year was related to gender ideologies. Specifically, students who were academically older were less likely to endorse Gender Awareness (*β*=-.051, *SE*=.019, z=-2.643, *p*=.008), Assimilationism (*β*=-.055, *SE*=.019, z=-2.864, *p*=.004), and Segregationism (*β*=-.090, *SE*=.019, z=-4.866, *p*<.001). There was no relationship between academic year and Gender Blindness.

Recall that data collection semester was examined as a continuous, centered predictor. Overall, data was collected in four different semesters. Unexpectedly, data collection semester was related to each of the gender ideologies. Students in later collection semesters were more likely to endorse Gender Blindness (*β*=.054, *SE*=.019, z=2.829, *p*=.005) and Gender Awareness (*β*=.104, *SE*=.019, z=-5.425, *p*<.001), but less likely to endorse Segregationism (*β*=-.086, *SE*=.019, z=-4.571, *p*<.001), and Assimilationism (*β*=-.069, *SE*=.018, z=3.730, *p*<.001). Aligning with this pattern, students in the second semester of data collection of gender-science stereotypes (this variable was only measured in 2 semesters) expressed weaker stereotypes than those in the first, *β*=-.119, *SE*=.058, z=-2.056, *p*=.04. Some of these patterns may be in fact due to slightly different types of enrollment in General Psychology in the Fall versus Spring semesters; specifically, the Spring semester tends to have more students from majors other than Psychology than the Fall semesters.

Due to these relationships, academic year in school and collection semester were included as covariates in our analyses. Importantly however, results were substantively equivalent whether collection semester was controlled in the models or not.

References

Nederhof, A. J. (1985). Methods of coping with social desirability bias: A review. *European Journal of Social Psychology*, *15*(3), 263-280.
